# Supplementary material for: CIrrMap250: annual maps of China's irrigated cropland from 2000 to 2020 developed through multisource data integration
Source: Copernicus journal article supplement (doi:10.5194/essd-16-5207-2024), 2024-11-12
Supplement: Supplementary file 1 [file essd-16-5207-2024-supplement.pdf]

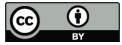

*Supplement of*

## **CirrMap250: annual maps of China’s irrigated cropland from 2000 to 2020 developed through multisource data integration**

**Ling Zhang et al.**

*Correspondence to:* Ling Zhang (zhanglingky@lzb.ac.cn)

The copyright of individual parts of the supplement might differ from the article licence.

## 1 Supplementary Figures

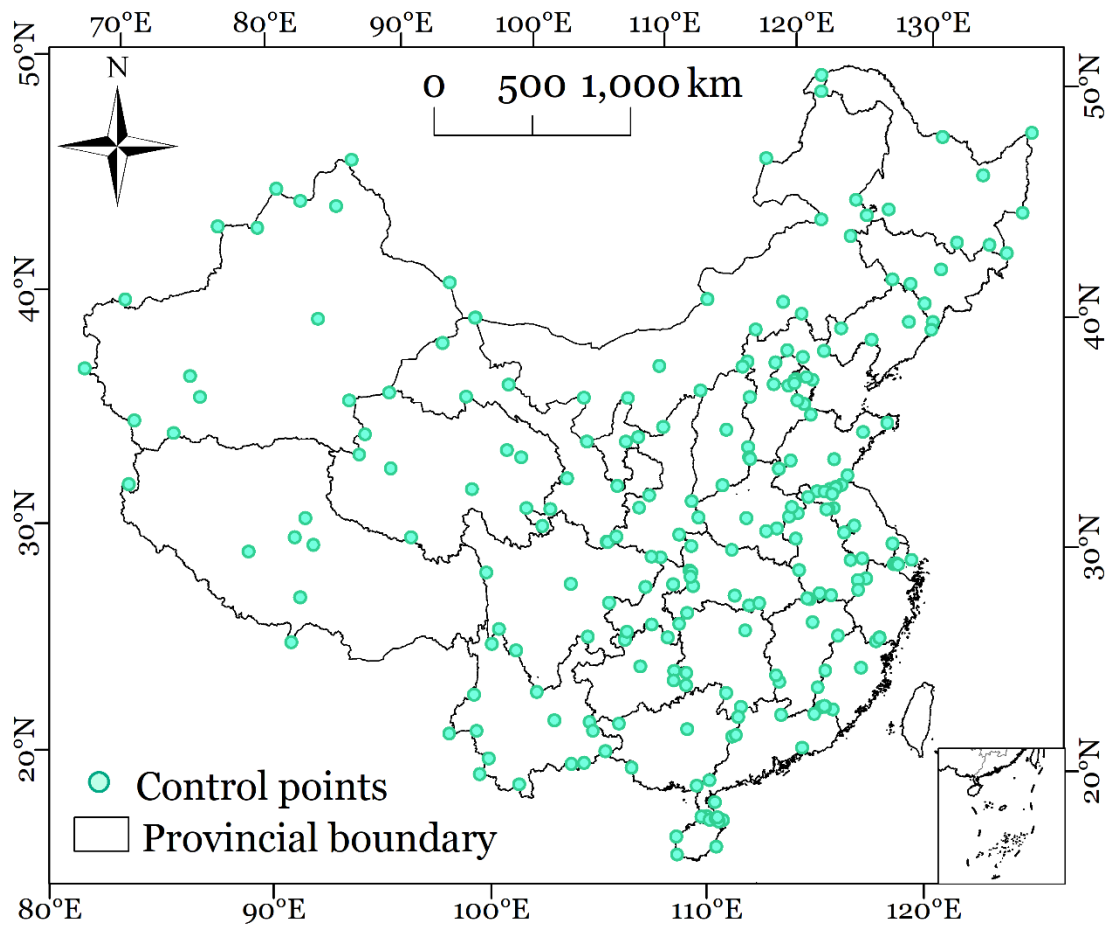

**Figure S1. Spatial distribution of the identified reference points used for georeferencing the land-use maps of China's second National Land Survey**

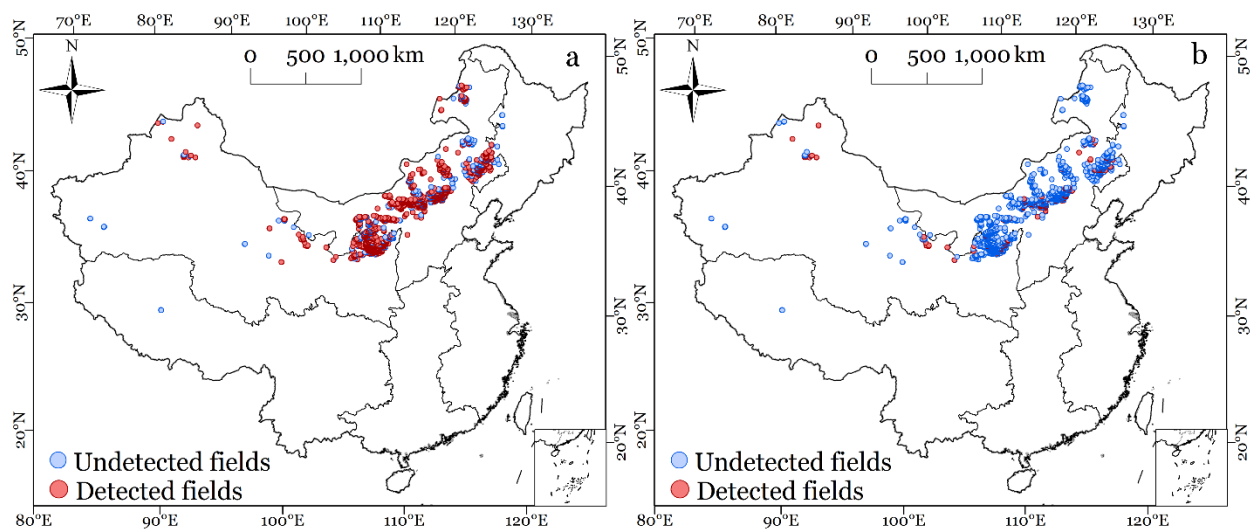

**Figure S2. Spatial distribution of the detected and undetected fields with center pivot irrigation systems for the year 2020.** Panels a and b show the results of CIrrMap250 and IrriMap\_CN, respectively.

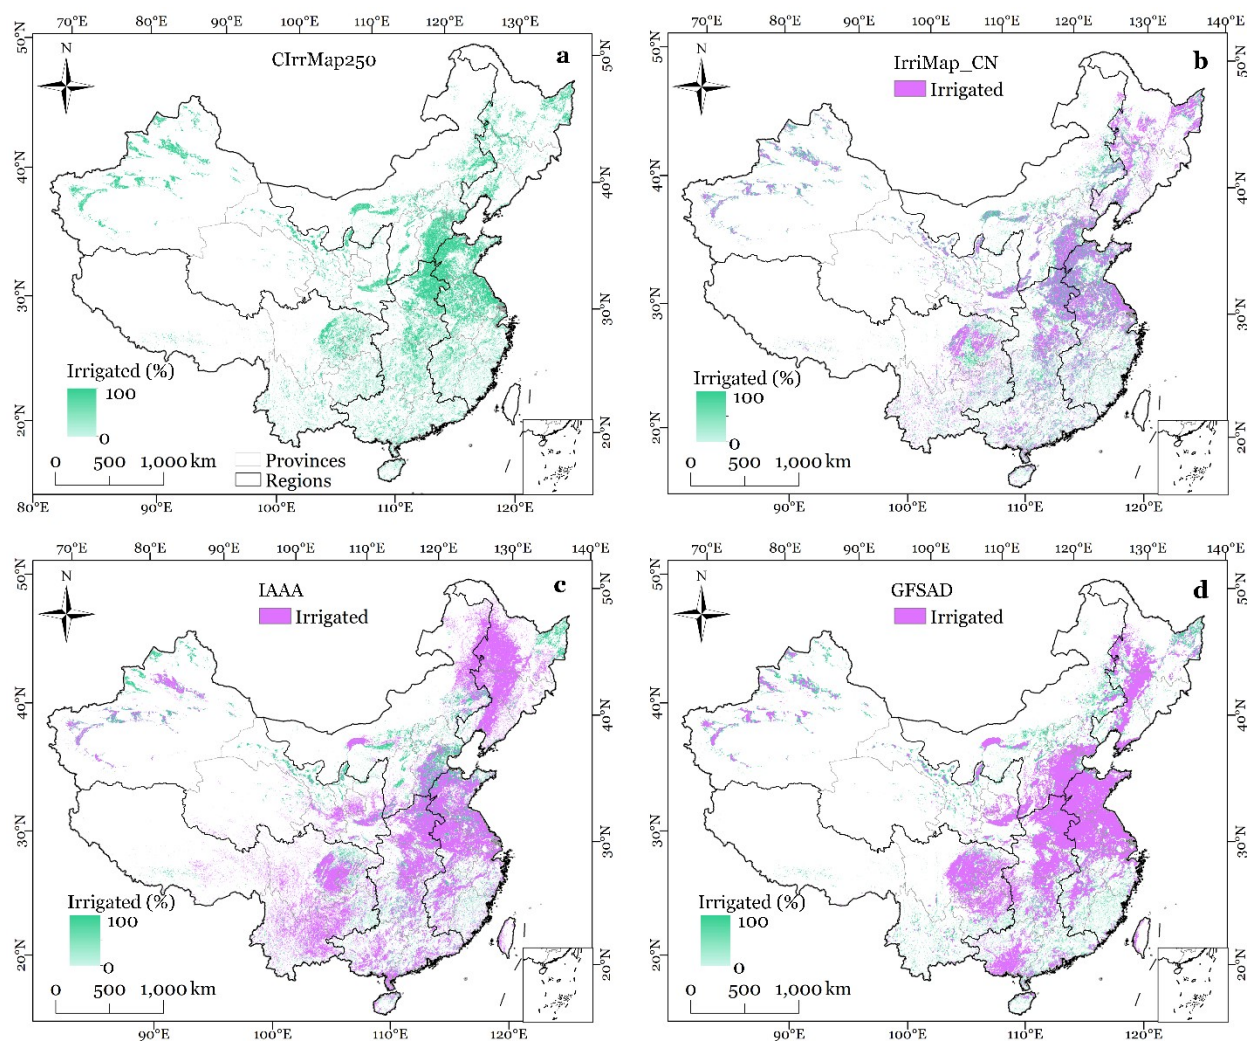

**Figure S3. Comparison of irrigated cropland distribution from CIRRMap250 with existing products (IrriMap\_CN, IAAA, GFSAD) for the year 2010. Panel a shows the spatial distribution of irrigated cropland from CIRRMap250, while panels b, c, and d overlay the existing binary maps IrriMap\_CN, IAAA, and GFSAD on CIRRMap250, respectively.**

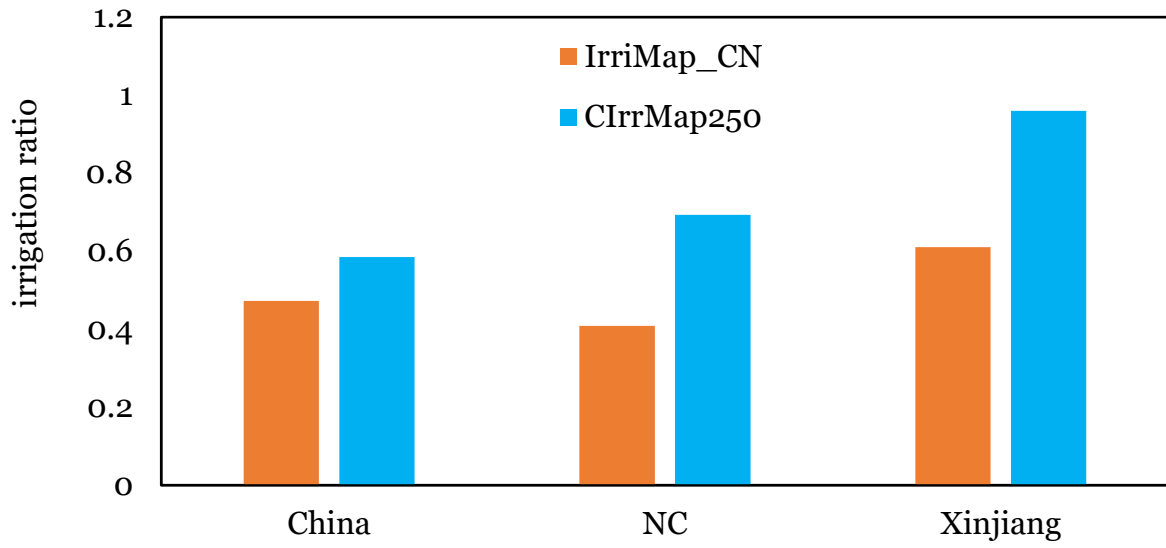

**Figure S4. Comparison of irrigated ratio estimates of CIrrMap250 and IrriMap\_CN in China, Northern China, Xinjiang Uygur Autonomous Region**

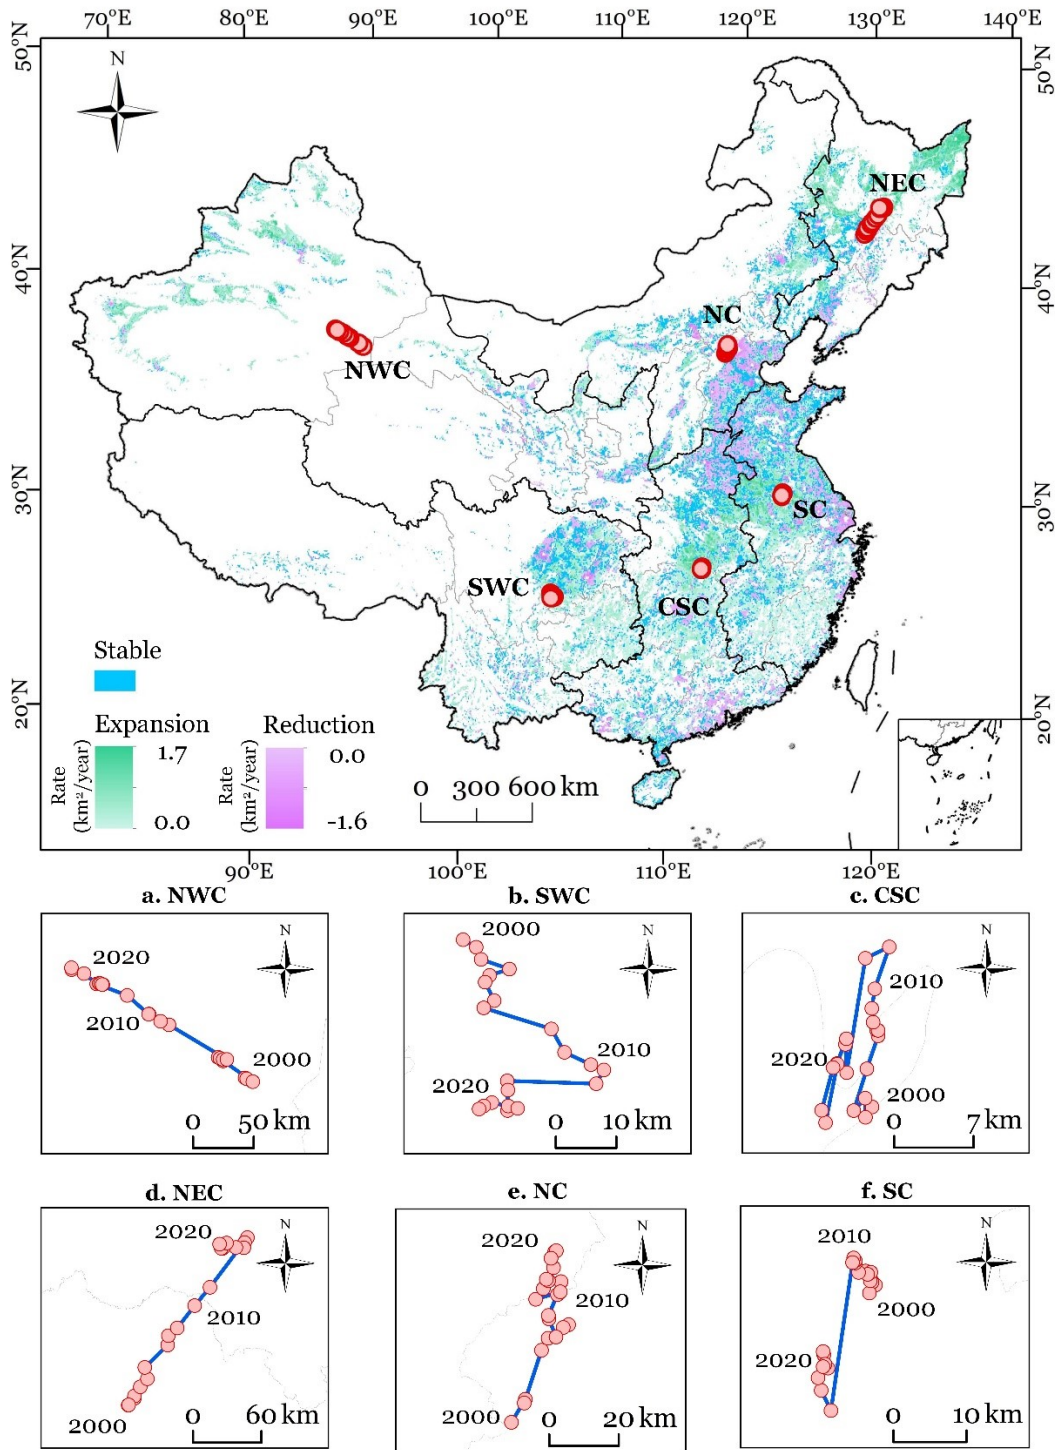

**Figure S5. Spatial trends in irrigated areas from 2000 to 2020 in the six subregions of China.** The top panel shows the interannual trend in irrigated area at the pixel scale (same as Figure 8 in the main text) and illustrates the locations of the gravity centers of irrigated areas for each subregion. Panels a-d depict the center-of-gravity movement of irrigated areas from 2000 to 2020 in each subregion.

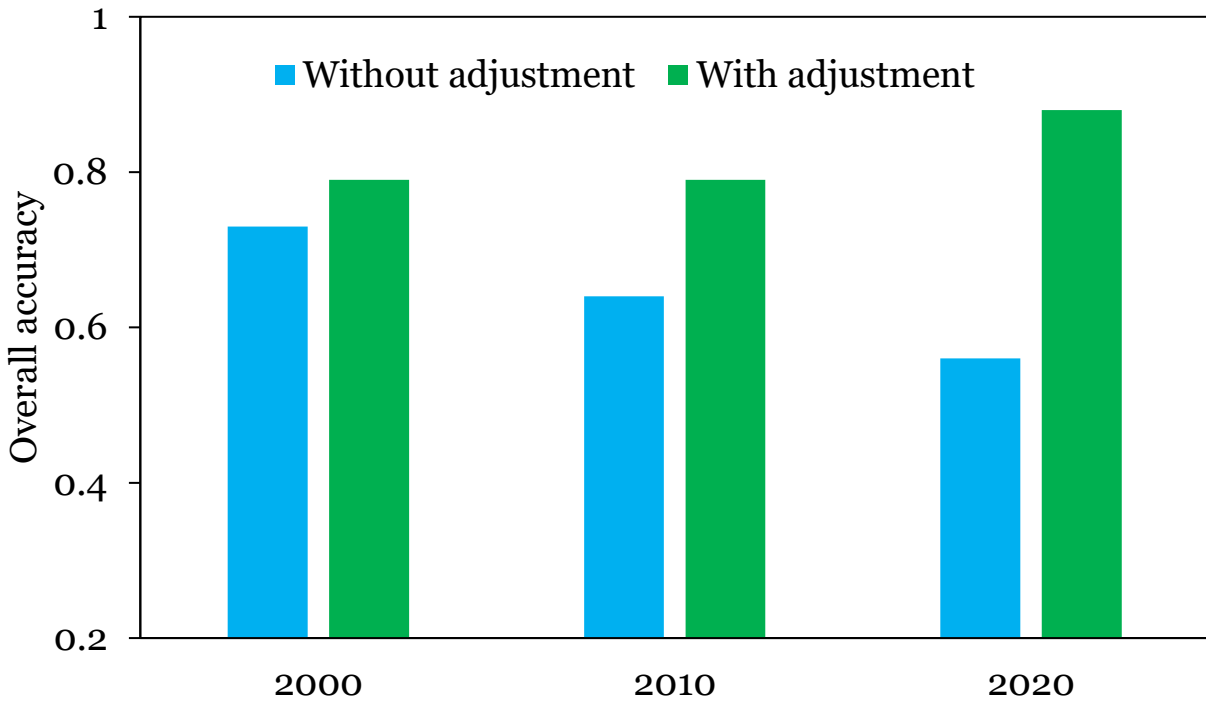

**Figure S6. Comparison of the performance of irrigation maps constrained by different irrigated area data.** “without adjustment” means the use of the original irrigation statistics, while “with adjustment” indicates the use of the harmonized and reconciled irrigated areas (this study).

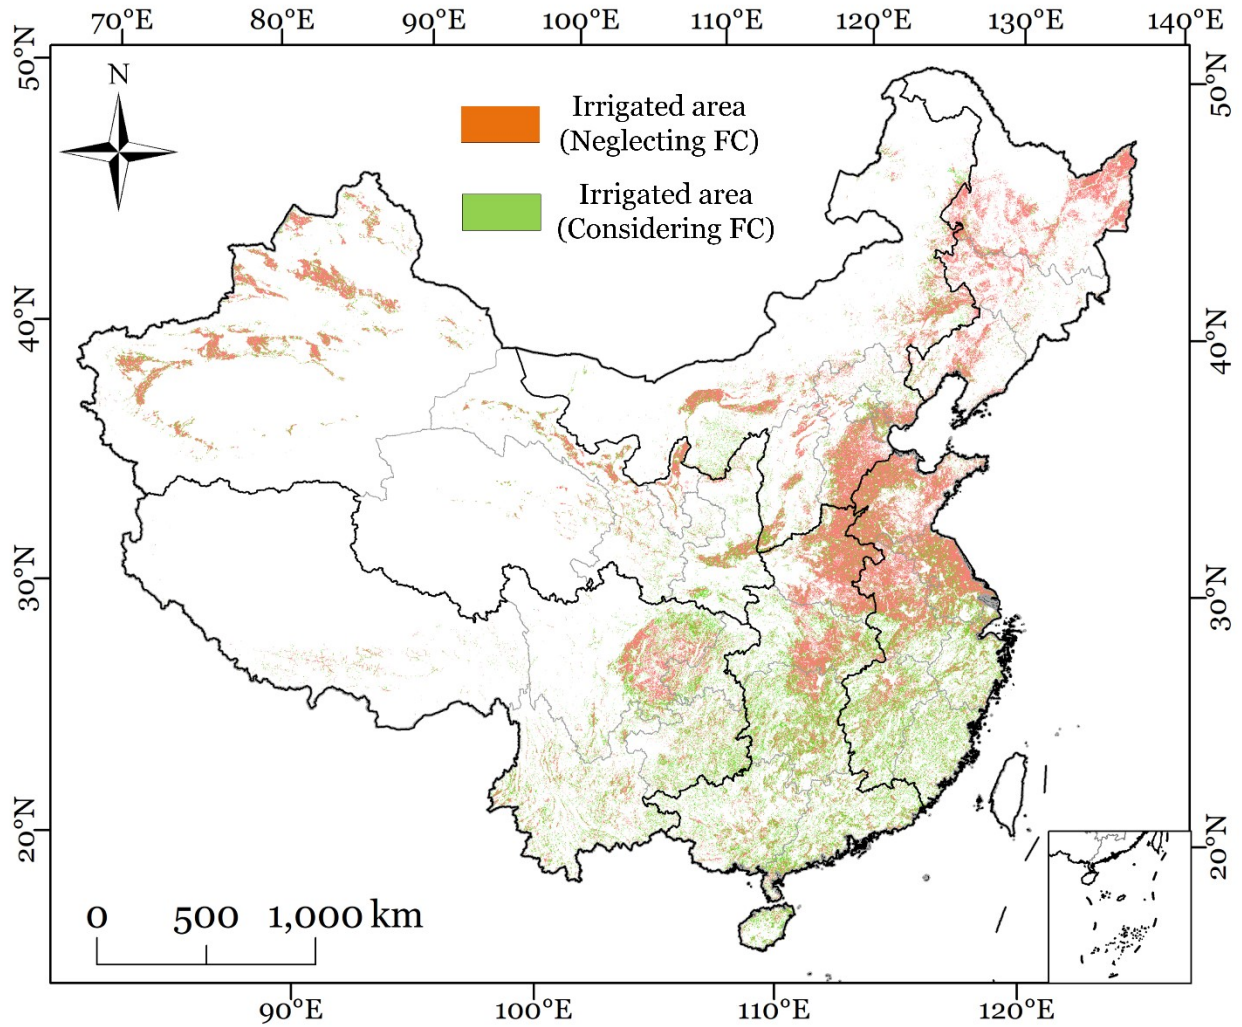

**Figure S7. Comparison of irrigated area distribution in the scenarios of considering fractional coverage (FC) of cropland (this study) and neglecting FC of cropland**



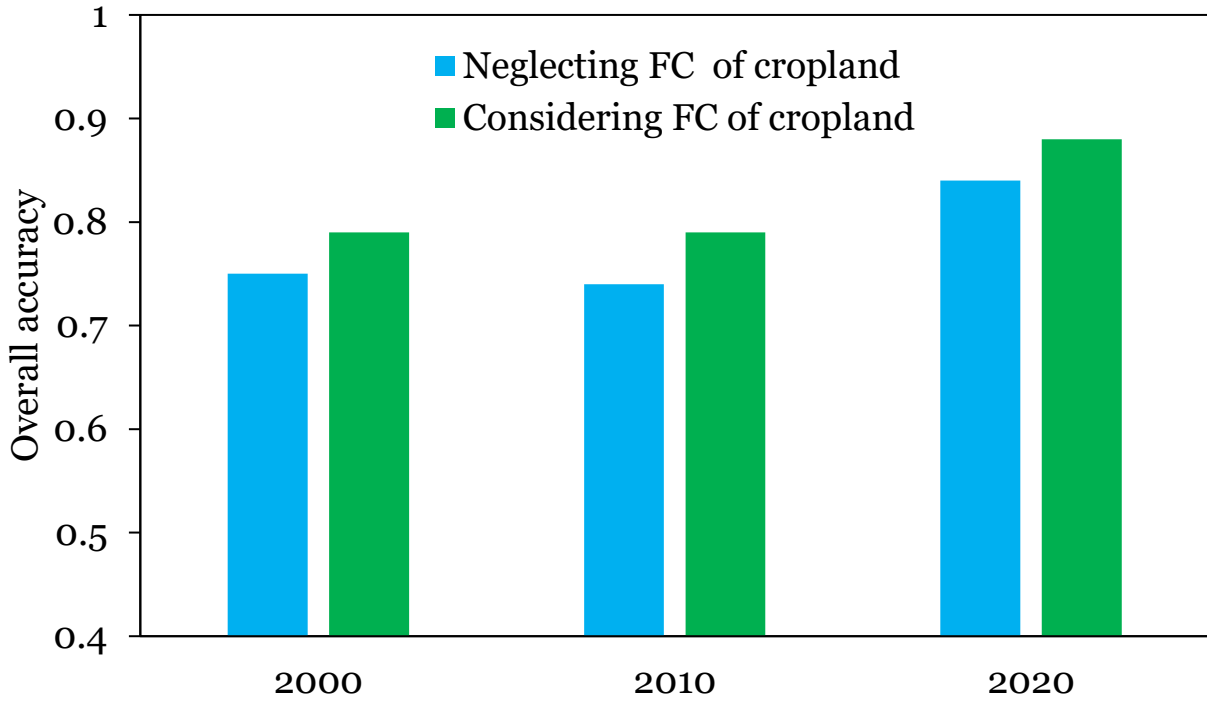

**Figure S8. Comparison of performance of irrigation maps in the scenarios of considering fractional coverage (FC) of cropland (this study) and neglecting FC of cropland**

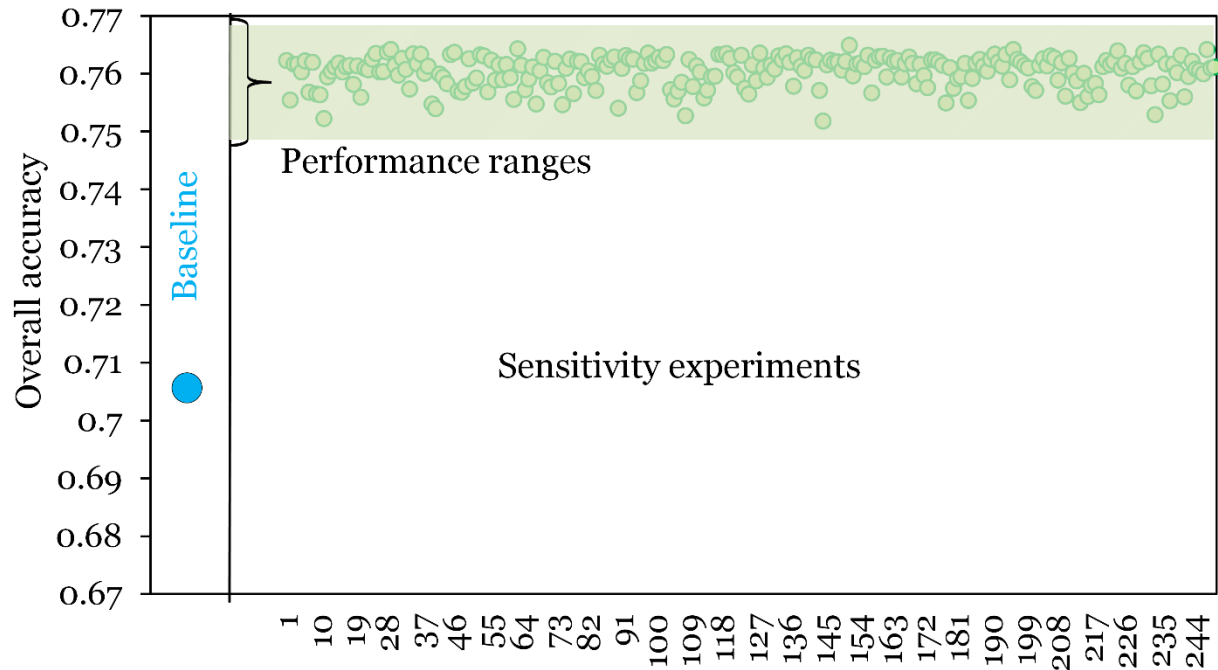

**Figure S9. Sensitivity analysis of irrigation map performance to the use of different irrigation suitability maps.** The performance of these irrigation maps was compared with the baseline irrigation map, which was created by the method in our study but disregarded irrigation suitability during the mapping process.

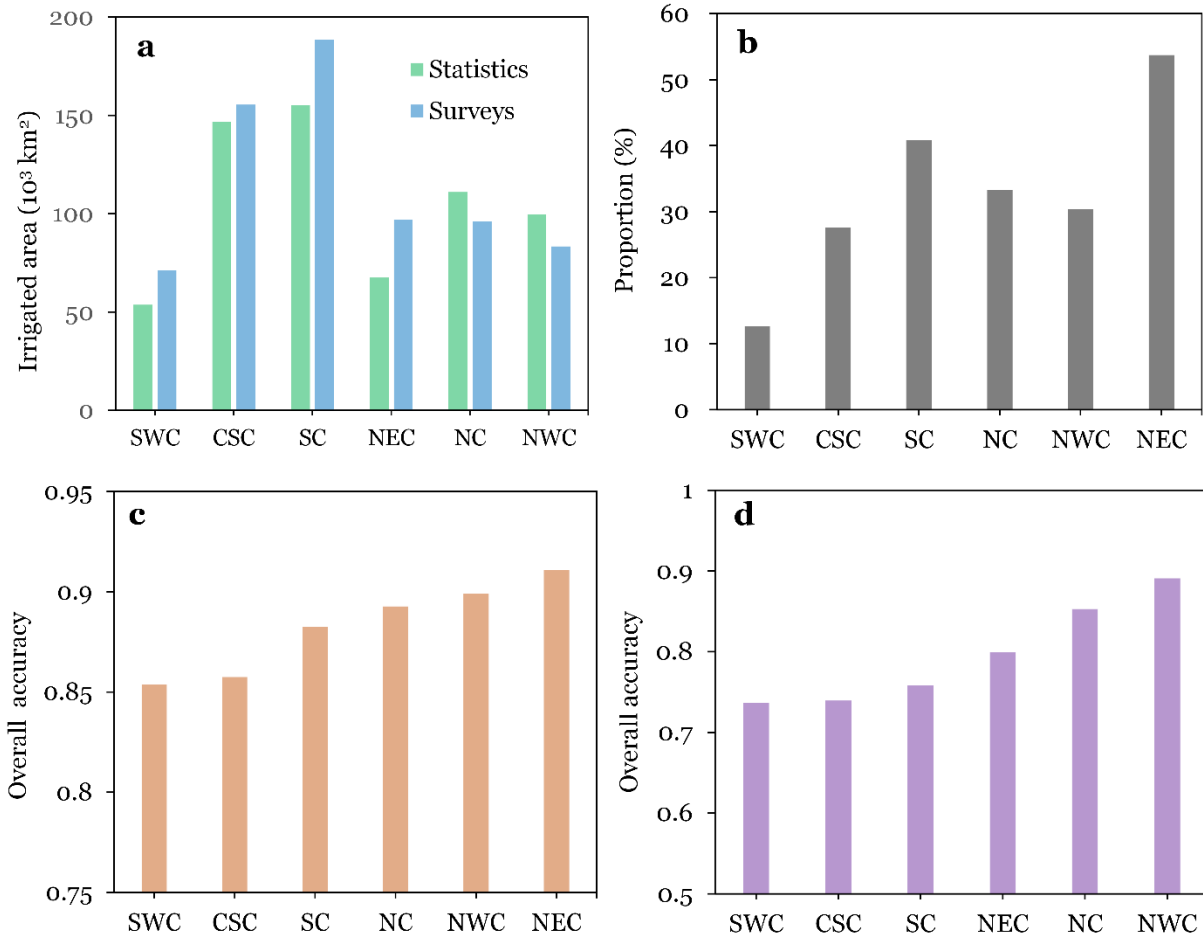

**Figure S10. Uncertainty analysis of the CIrrMap250 product.** **a.** Comparison of statistics and surveys of irrigated area across different subregions. **b.** Proportion of croplands consistently identified by five state-of-the-art remote sensing land use/cover products, including GlobeLand30 (Chen et al., 2015), GLAD (Potapov et al., 2021), CLUD (Liu et al., 2014), CLCD (Yang and Huang, 2021), and CACD (Yu et al., 2021). **c.** Comparison of the accuracy of the hybrid cropland product CCropLand30 across different subregions. **d.** Comparison of the accuracy of CIrrMap250 (for the year 2010) across different subregions.

## 2 Supplementary Tables

**Table S1. Summary of MODIS-derived vegetation indices used in this study**

| Vegetation indices | Formula                                                                                   | MODIS bands                                      | Resolution   |
|--------------------|-------------------------------------------------------------------------------------------|--------------------------------------------------|--------------|
| NDVI               | $(\text{NIR} - \text{Red}) / (\text{NIR} + \text{Red})$                                   | Band 01 (Red)<br>Band 02 (NIR)                   | 250 m/16 day |
| EVI                | $2.5 * (\text{NIR} - \text{Red}) / (\text{NIR} + 6 * \text{Red} - 7.5 * \text{Blue} + 1)$ | Band 01 (Red)<br>Band 02 (NIR)<br>Band 03 (Blue) | 250 m/16 day |
| GI                 | NIR/Green                                                                                 | Band 02 (NIR)<br>Band 04 (Green)                 | 250 m/8 day  |

where NIR is the near-infrared band (841-876 nm); and Red (620-670 nm), Blue (459-479 nm) and Green (545 – 565 nm) are the visible red band, visible blue band, and visible green band, respectively.

**Table S2. Summary of the products and variables used in this study**

| Product /variable           | Description                                                               | Formula                                    | Source                  |
|-----------------------------|---------------------------------------------------------------------------|--------------------------------------------|-------------------------|
| CCropLand30                 | Hybrid cropland product for China                                         | —                                          | Zhang et al. (2024)     |
| CLUD                        | China's Land-use/cover dataset                                            | —                                          | Liu et al. (2014)       |
| NDVI/EVI/GI                 | Normalized Vegetation Index / Enhanced Vegetation Index / Greenness Index | See Table S1                               | MODIS <sup>a</sup>      |
| Irrigation suitability      | Suitability of cropland for irrigation                                    | Equation 4 in the main text                | PWRD <sup>d</sup>       |
| SVI                         | Irrigation suitability-adjusted peak vegetation index                     | Equation 5 in the main text                | This study <sup>b</sup> |
| Precipitation               | Annual precipitation                                                      | $\sum_{i=1}^{Ydays} PCP_i$                 | NMIC <sup>c</sup>       |
| Temperature                 | Mean annual temperature                                                   | $\frac{1}{Ydays} \sum_{i=1}^{Ydays} TMP_i$ | NMIC <sup>c</sup>       |
| PET                         | Annual evapotranspiration                                                 | $\sum_{i=1}^{Ydays} PET_i$                 | This study <sup>b</sup> |
| Aridity index               | Degree of dryness of the climate                                          | $MA\_PCP/MA\_PET$                          | This study <sup>b</sup> |
| Irrigation water withdrawal | Total amount of water withdrawals used for crop irrigation                | —                                          | This study <sup>b</sup> |
| WSI                         | Water scarcity index                                                      | $TWU/WA$                                   | Zhang et al. (2023)     |
| Cropping intensity          | Number of crops grown on the same field in a given agricultural year      | —                                          | Xu et al. (2017)        |
| Soil type                   | Genetic soil classification system in China                               | —                                          | RESDC <sup>e</sup>      |

|                           |                                                                    |   |                         |
|---------------------------|--------------------------------------------------------------------|---|-------------------------|
| Elevation                 | Mean elevation                                                     | — | SRTM <sup>f</sup>       |
| Slope                     | Mean slope                                                         | — | This study <sup>b</sup> |
| Distances to water bodies | Euclidean distance to rivers, lakes, reservoirs, canals, and ponds | — | This study <sup>b</sup> |

Note. <sup>a</sup>indicates variables derived from Moderate Resolution Imaging Spectroradiometer (MODIS) data (<https://modis.gsfc.nasa.gov/>). <sup>b</sup>indicates variables generated in this study. <sup>c</sup>indicates the National Meteorological Information Center (<http://data.cma.cn/>). <sup>d</sup>indicates the provincial water resources departments. <sup>e</sup>indicates the Resource and Environment Science and Data Center (<https://www.resdc.cn/Default.aspx>). <sup>f</sup>indicates the Shuttle Radar Topography Mission (<https://www.earthdata.nasa.gov/sensors/srtm>). *Ydays* represents the number of days in a given year;  $PCP_i$  denotes the amount of precipitation at the  $i^{\text{th}}$  day;  $TMP_i$  indicates mean air temperature at the  $i^{\text{th}}$  day;  $PET_i$  represents evapotranspiration estimated using the Priestley-Taylor method (Priestley and Taylor, 1972);  $MA\_PCP$  and  $MA\_PET$  denote mean annual precipitation and PET, respectively;  $TWU$  represents total water use, including both groundwater and surface water withdrawals for irrigation, industry, domestic purposes, forestry, livestock, and fishery;  $WA$  represents water availability and refers to the total surface water and groundwater generated by precipitation.

**Table S3. Suitability values for the influencing factors of irrigation suitability**

| Influencing factors | Reclassification       | Suitability value |
|---------------------|------------------------|-------------------|
| elevation           | S1: < min+100          | S1=4              |
|                     | S2: [min+100, min+300] | S2=3              |
|                     | S3: [min+300, min+500] | S3=2              |
|                     | S4: > min+500          | S4=1              |
| slope               | S1: <2%                | S1=4              |
|                     | S2: [2%, 4%]           | S2=3              |
|                     | S3: [4%, 8%]           | S3=2              |
|                     | S4: > 8%               | S4=1              |
| aridity index       | S1: <0.1               | S1=10             |
|                     | S2: [0.1, 0.2]         | S2=9              |
|                     | S3: [0.2, 0.3]         | S3=8              |
|                     | S4: [0.3, 0.4]         | S4=7              |
|                     | S5: [0.4, 0.5]         | S5=6              |
|                     | S6: [0.5, 0.6]         | S6=5              |
|                     | S7: [0.6, 0.7]         | S7=4              |
|                     | S8: [0.7, 0.8]         | S8=3              |
|                     | S9: [0.8, 0.9]         | S9=2              |
|                     | S10: >0.9              | S10=1             |

Note: min is minimum elevation of the mapping unit

**Table S4. Optimized hyperparameters of the random forest algorithm**

| Hyperparameters | Descriptions                                                | values |
|-----------------|-------------------------------------------------------------|--------|
| <i>Ntree</i>    | Number of trees                                             | 200    |
| <i>MinObs</i>   | Minimum number of observations per node                     | 10     |
| <i>Nsplit</i>   | Number of variables randomly sampled at each decision split | 7      |

**Table S5. Definitions of the performance metrics**

| Metrics             | Formula                                                                                                      | Variables                                                                                                                                                                                                                                                                                                                                                                                               |
|---------------------|--------------------------------------------------------------------------------------------------------------|---------------------------------------------------------------------------------------------------------------------------------------------------------------------------------------------------------------------------------------------------------------------------------------------------------------------------------------------------------------------------------------------------------|
| Overall accuracy    | $\frac{\sum_{i=1}^n P_{ii}}{N}$                                                                              | <i>n</i> is the number of classes; $P_{ii}$ is the number of pixels on row <i>i</i> and column <i>i</i> in the confusion matrix, which represent the total number of pixels correctly classified; <i>N</i> is total number of pixels used for accuracy evaluation; $P_{i+}$ and $P_{+i}$ are the total number of pixels on row <i>i</i> (observations) and column <i>i</i> (predictions), respectively. |
| F1-score            | $2 \frac{\frac{P_{ii}}{P_{+i}} \times \frac{P_{ii}}{P_{i+}}}{\frac{P_{ii}}{P_{+i}} + \frac{P_{ii}}{P_{i+}}}$ |                                                                                                                                                                                                                                                                                                                                                                                                         |
| Producer's accuracy | $\frac{P_{ii}}{P_{+i}}$                                                                                      |                                                                                                                                                                                                                                                                                                                                                                                                         |
| User's accuracy     | $\frac{P_{ii}}{P_{i+}}$                                                                                      |                                                                                                                                                                                                                                                                                                                                                                                                         |

**Table S6. Performance metric values of CIrrMap250 and existing maps (IrriMap\_CN, IAAA, GFSAD). OA, PU, UA represent overall accuracy, producer's accuracy, and user's accuracy, respectively.**

| Year | Products   | OA   | F1-score | Irr PA | Irr UA | NIrr PA | NIrr UA |
|------|------------|------|----------|--------|--------|---------|---------|
| 2000 | CIrrMap250 | 0.79 | 0.78     | 0.80   | 0.78   | 0.77    | 0.79    |
|      | IrriMap_CN | 0.68 | 0.73     | 0.51   | 0.80   | 0.87    | 0.63    |
|      | IAAA       | 0.55 | 0.50     | 0.66   | 0.56   | 0.45    | 0.55    |
| 2010 | CIrrMap250 | 0.79 | 0.71     | 0.83   | 0.83   | 0.71    | 0.71    |
|      | IrriMap_CN | 0.66 | 0.62     | 0.61   | 0.81   | 0.75    | 0.53    |
|      | IAAA       | 0.61 | 0.50     | 0.64   | 0.71   | 0.54    | 0.46    |
|      | GFSAD      | 0.59 | 0.51     | 0.60   | 0.71   | 0.58    | 0.46    |
| 2020 | CIrrMap250 | 0.88 | -        | 0.88   | 1      | -       | -       |
|      | IrriMap_CN | 0.20 | -        | 0.20   | 1      | -       | -       |

Note. CIrrMap250 and IrriMap\_CN achieves a perfect user's accuracy for the irrigation class in 2020 because all the reference points are irrigated samples.



**Table S7. Confusion matrix for CIrrMap250 and existing maps (IrriMap\_CN, IAAA, GFSAD) in 2000, 2010, and 2020, respectively**

|      | Products   | Classified    | Reference |               |
|------|------------|---------------|-----------|---------------|
|      |            |               | Irrigated | Non-irrigated |
| 2000 | CIrrMap250 | Irrigated     | 271       | 75            |
|      |            | Non-irrigated | 66        | 246           |
|      | IrriMap_CN | Irrigated     | 172       | 43            |
|      |            | Non-irrigated | 165       | 278           |
|      | IAAA       | Irrigated     | 221       | 177           |
|      |            | Non-irrigated | 116       | 144           |
|      | Products   | Classified    | Reference |               |
|      |            |               | Irrigated | Non-irrigated |
| 2010 | CIrrMap250 | Irrigated     | 6818      | 1385          |
|      |            | Non-irrigated | 1365      | 3325          |
|      | IrriMap_CN | Irrigated     | 5003      | 1167          |
|      |            | Non-irrigated | 3180      | 3543          |
|      | IAAA       | Irrigated     | 5274      | 2183          |
|      |            | Non-irrigated | 2909      | 2527          |
|      | GFSAD      | Irrigated     | 4939      | 1995          |
|      |            | Non-irrigated | 3244      | 2715          |
|      | Products   | Classified    | Reference |               |
|      |            |               | Irrigated | Non-irrigated |
| 2020 | CIrrMap250 | Irrigated     | 6340      | 0             |
|      |            | Non-irrigated | 849       | 0             |
|      | IrriMap_CN | Irrigated     | 1426      | 0             |
|      |            | Non-irrigated | 5763      | 0             |

## References

- Chen, J., Chen, J., Liao, A., Cao, X., Chen, L., Chen, X., He, C., Han, G., Peng, S., Lu, M., Zhang, W., Tong, X., Mills, J., 2015. Global land cover mapping at 30m resolution: A POK-based operational approach. *ISPRS Journal of Photogrammetry and Remote Sensing*, 103: 7-27. DOI:10.1016/j.isprsjprs.2014.09.002
- Liu, J., Kuang, W., Zhang, Z., Xu, X., Qin, Y., Ning, J., Zhou, W., Zhang, S., Li, R., Yan, C., Wu, S., Shi, X., Jiang, N., Yu, D., Pan, X., Chi, W., 2014. Spatiotemporal characteristics, patterns, and causes of land-use changes in China since the late 1980s. *Journal of Geographical Sciences*, 24(2): 195-210. DOI:10.1007/s11442-014-1082-6
- Priestley, C. H. B. and Taylor, R. J.: On the Assessment of Surface Heat Flux and Evaporation Using Large-Scale Parameters, *Monthly Weather Review*, 100, 81-92, 10.1175/1520-0493(1972)100<0081:OTAOSH>2.3.CO;2, 1972.
- Potapov, P., Turubanova, S., Hansen, M.C., Tyukavina, A., Zalles, V., Khan, A., Song, X.-P., Pickens, A., Shen, Q., Cortez, J., 2021. Global maps of cropland extent and change show accelerated cropland expansion in the twenty-first century. *Nature Food*. DOI:10.1038/s43016-021-00429-z
- Xu, X., 2017. Remote sensing-derived crop intensity for China's cropland (in Chinese). <http://www.resdc.cn>. DOI:10.12078/2017122201
- Yang, J., Huang, X., 2021. The 30 m annual land cover dataset and its dynamics in China from 1990 to 2019. *Earth System Science Data*, 13(8): 3907-3925. DOI:10.5194/essd-13-3907-2021
- Yu, Z., Jin, X., Miao, L., Yang, X., 2021. A historical reconstruction of cropland in China from 1900 to 2016. *Earth System Science Data*, 13(7): 3203-3218. DOI:10.5194/essd-13-3203-2021
- Zhang, L., Ma, Q., Zhao, Y., Chen, H., Hu, Y., and Ma, H. 2023. China's strictest water policy: Reversing water use trends and alleviating water stress, *Journal of Environmental Management*, 345, 118867, 10.1016/j.jenvman.2023.118867
- Zhang, L., Wang, W., Ma, Q., Hu, Y., and Zhao, Y. 2024. CCropLand30: High-resolution hybrid cropland maps of China created through the synergy of state-of-the-art remote sensing products and the latest national land survey, *Computers and Electronics in Agriculture*, 218, 108672, 10.1016/j.compag.2024.108672
